# Supplementary material for: An automated methodology for differentiating rock from snow, clouds and seain Antarctica from Landsat 8 imagery: a new rock outcrop map and areaestimation for the entire Antarctic continent
Source: Copernicus journal article supplement (doi:10.5194/tc-10-1665-2016), 2016-08-01
Supplement: Supplementary file 1 [file Fig 8 Enlarged - All QC Areas.pdf › Supplementary Material/Fig 8 Enlarged - All QC Areas.pdf]

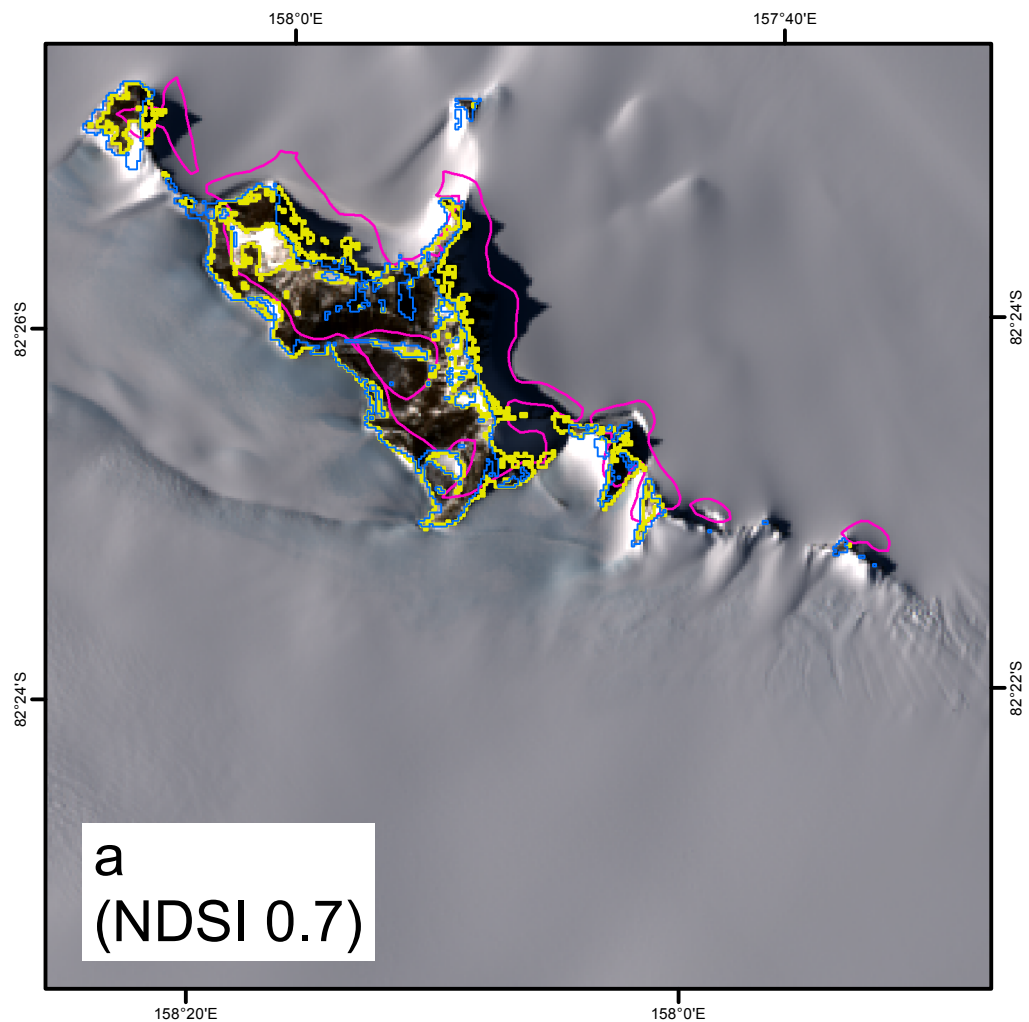

0 1 2 km

- Optimum NDSI
- Automated Outcrop Identification (presented here)
- ADD Rock Outcrop

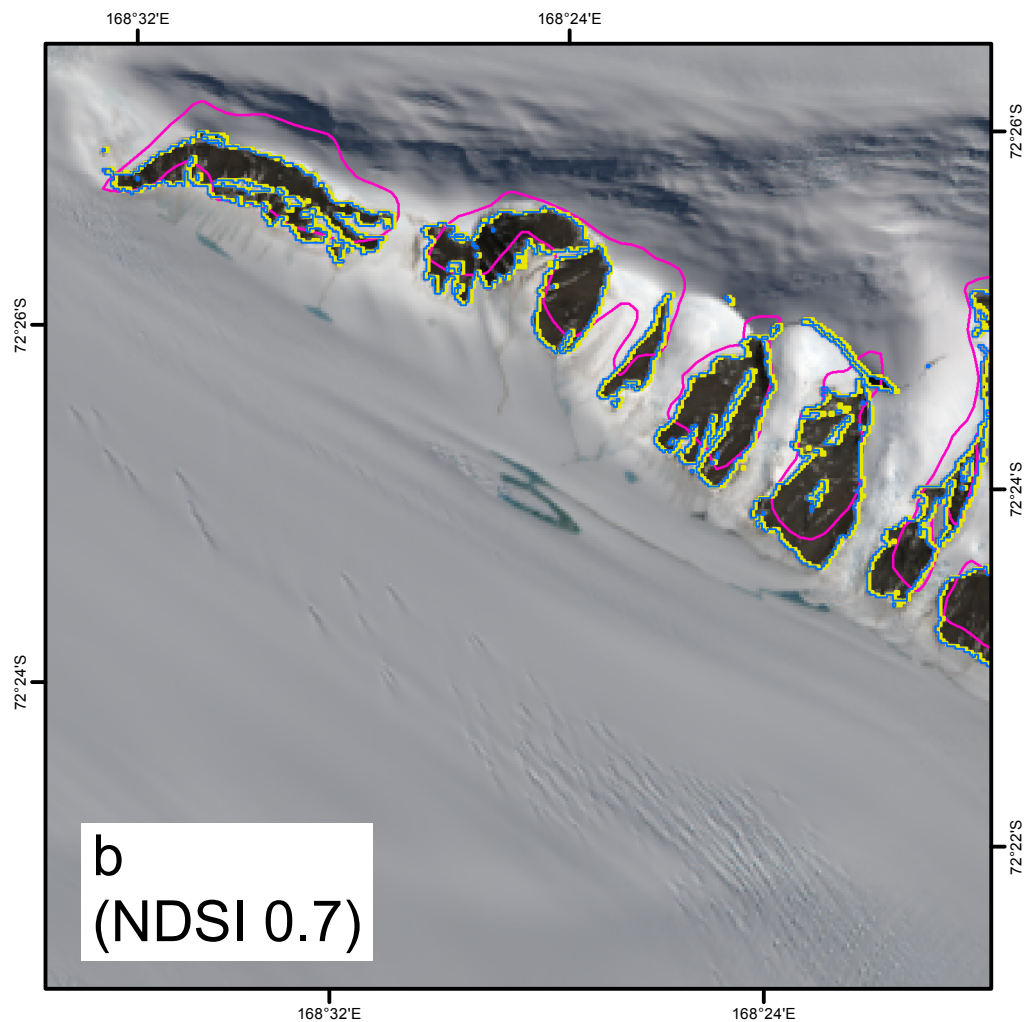

0 1 2 km

-  Optimum NDSI
-  Automated Outcrop Identification (presented here)
-  ADD Rock Outcrop

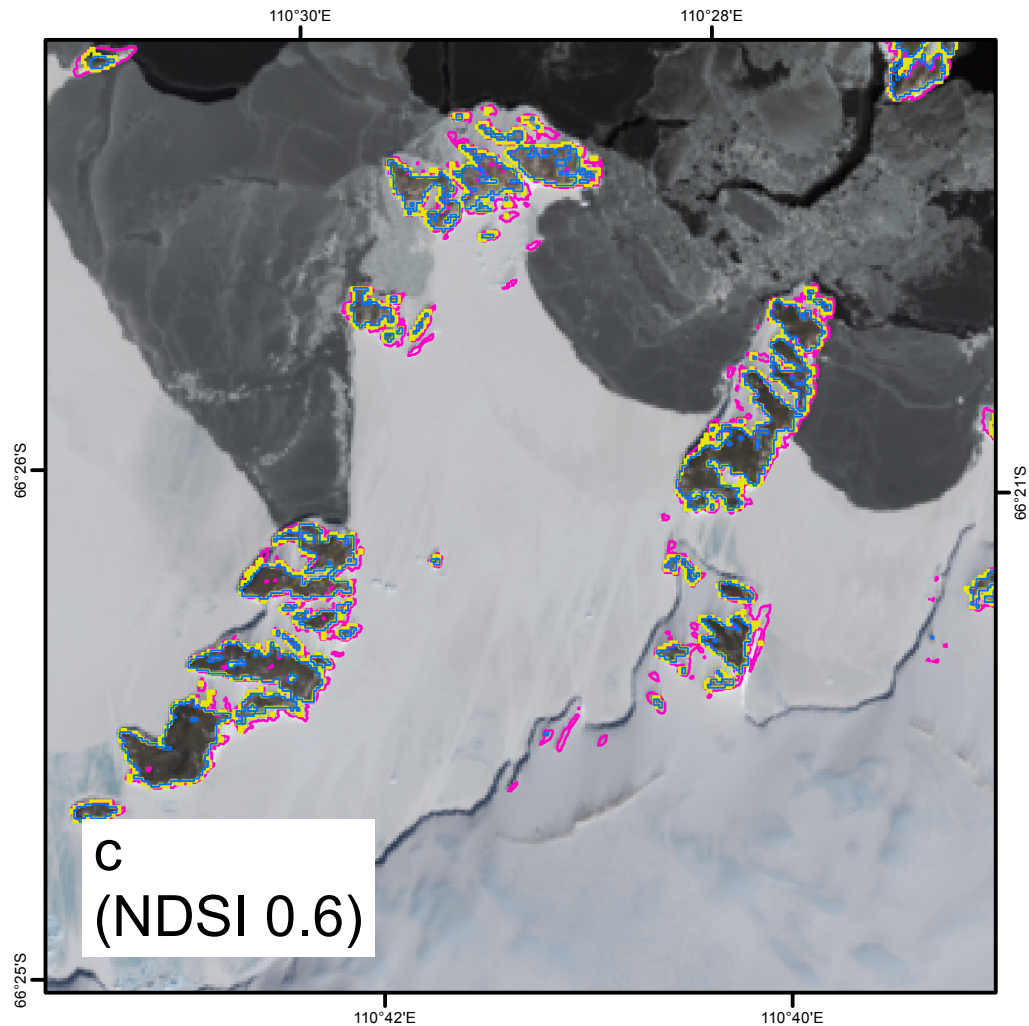

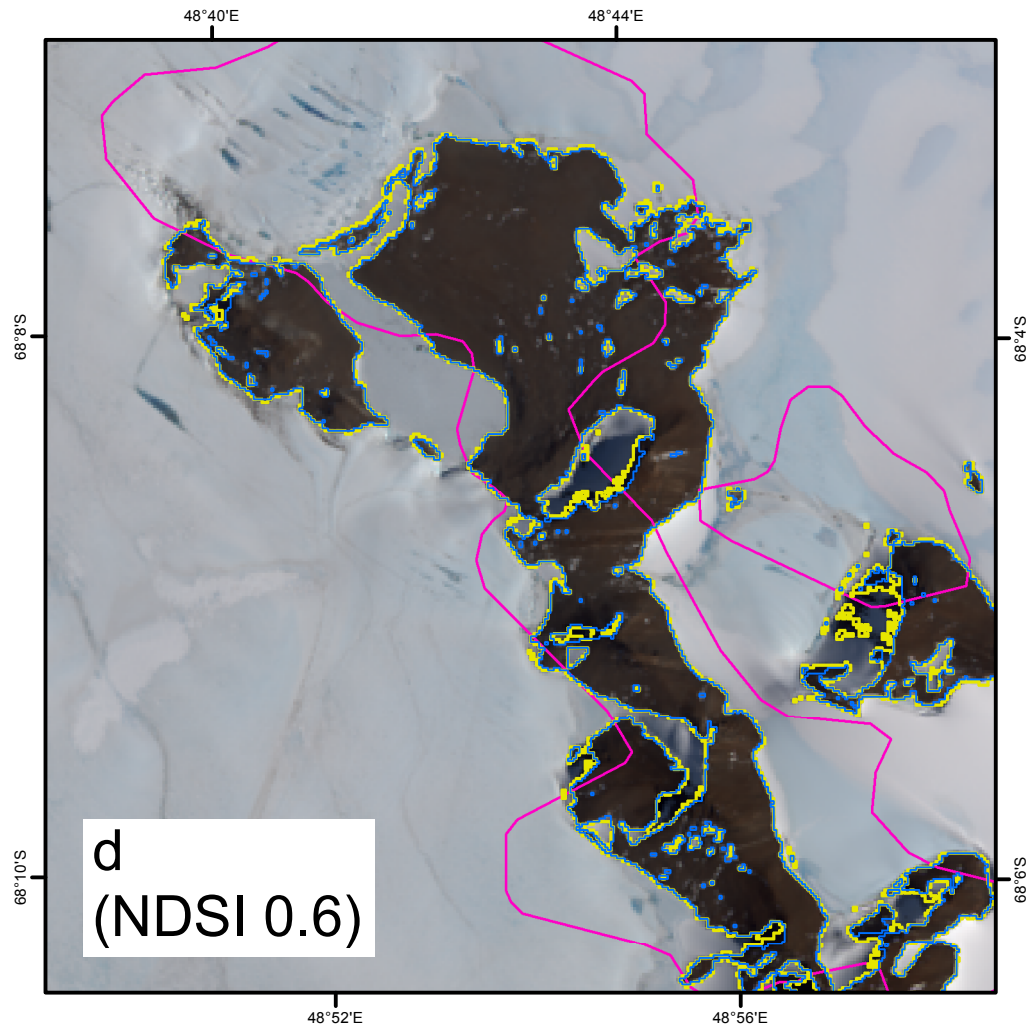

0 1 2 km

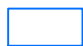

Optimum NDSI

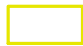

Automated Outcrop  
Identification  
(presented here)

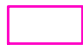

ADD Rock Outcrop

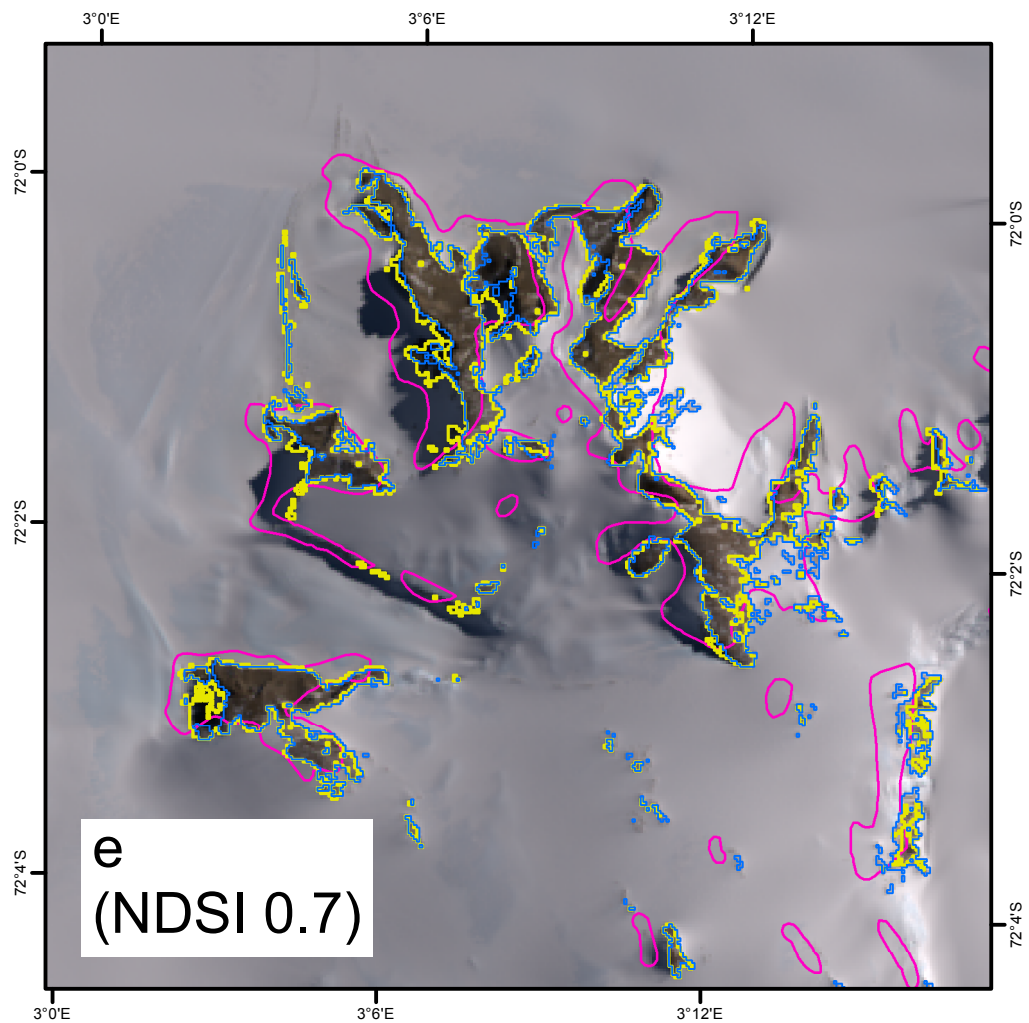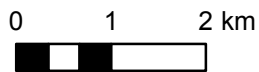

-  Optimum NDSI
-  Automated Outcrop Identification (presented here)
-  ADD Rock Outcrop

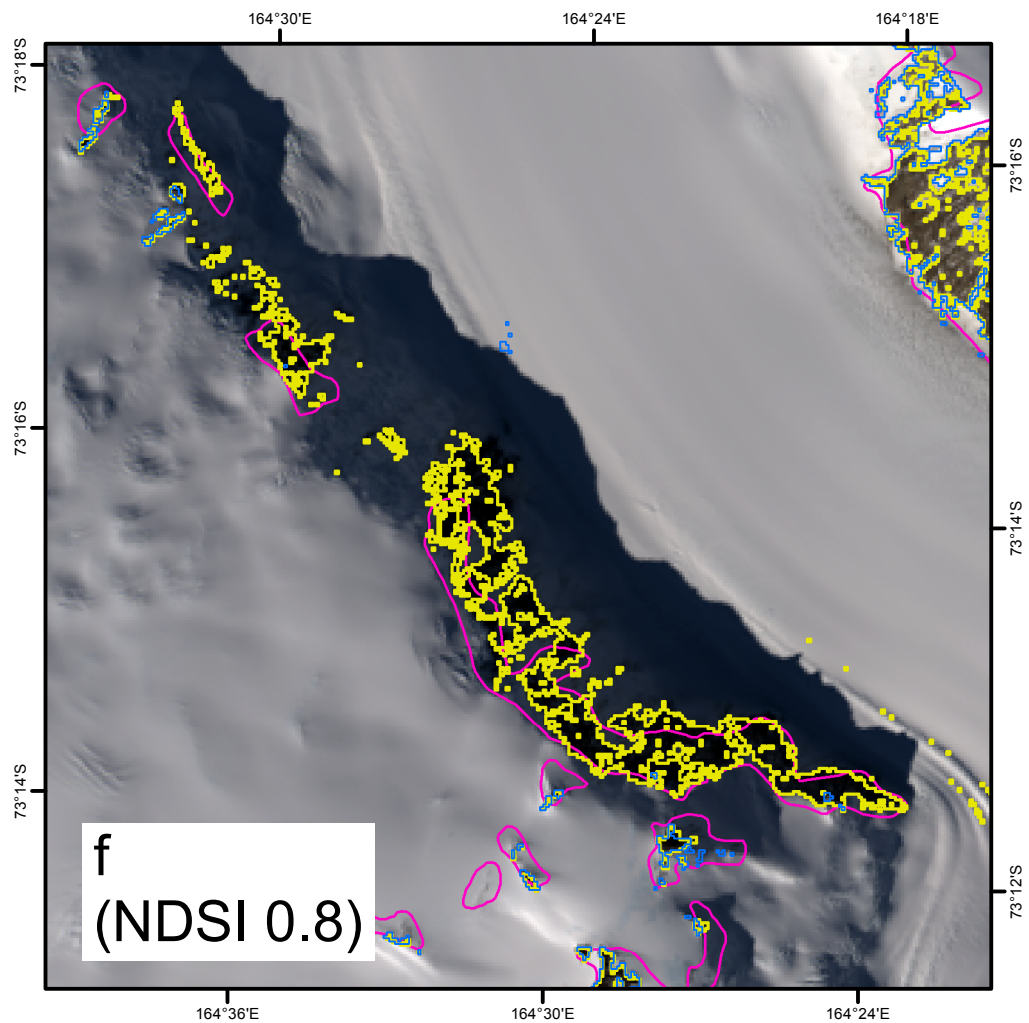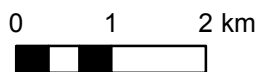

-  Optimum NDSI
-  Automated Outcrop Identification (presented here)
-  ADD Rock Outcrop

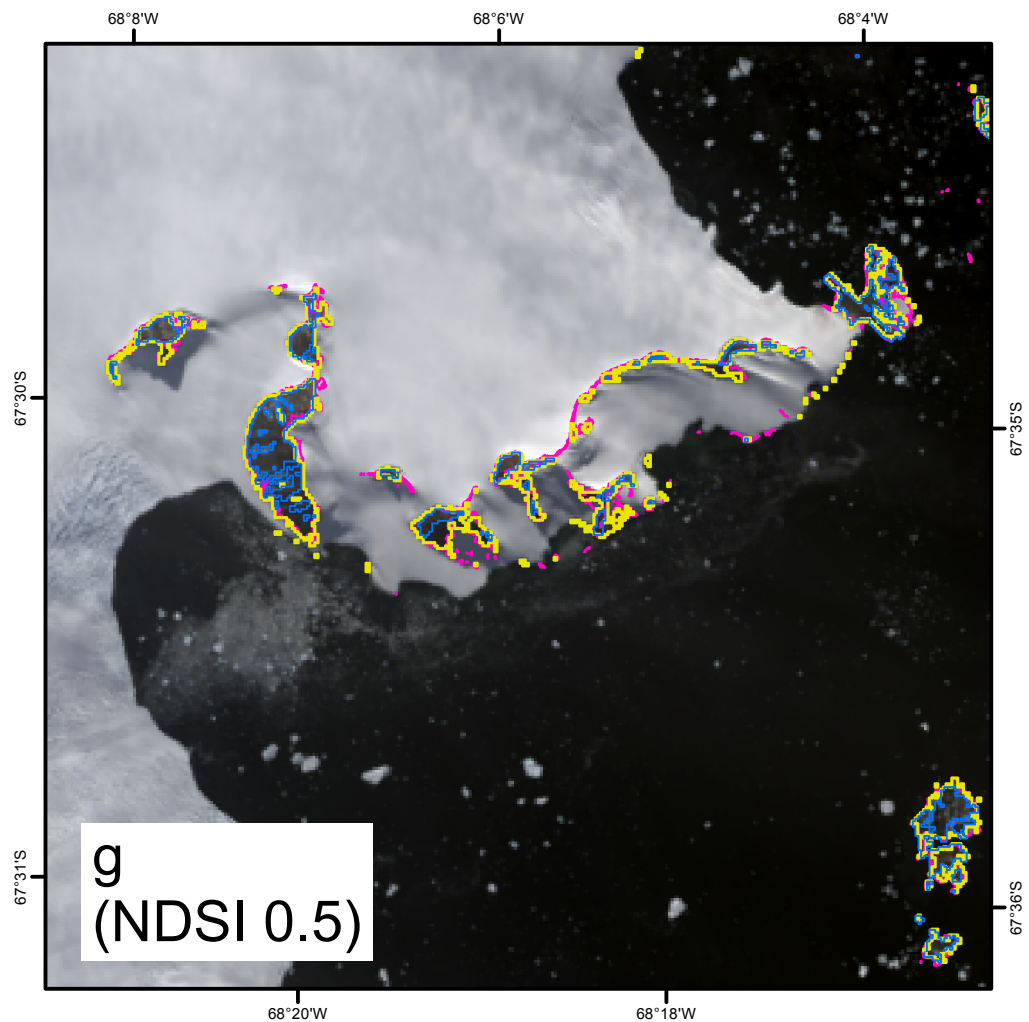

0 1 2 km

-  Optimum NDSI
-  Automated Outcrop Identification (presented here)
-  ADD Rock Outcrop



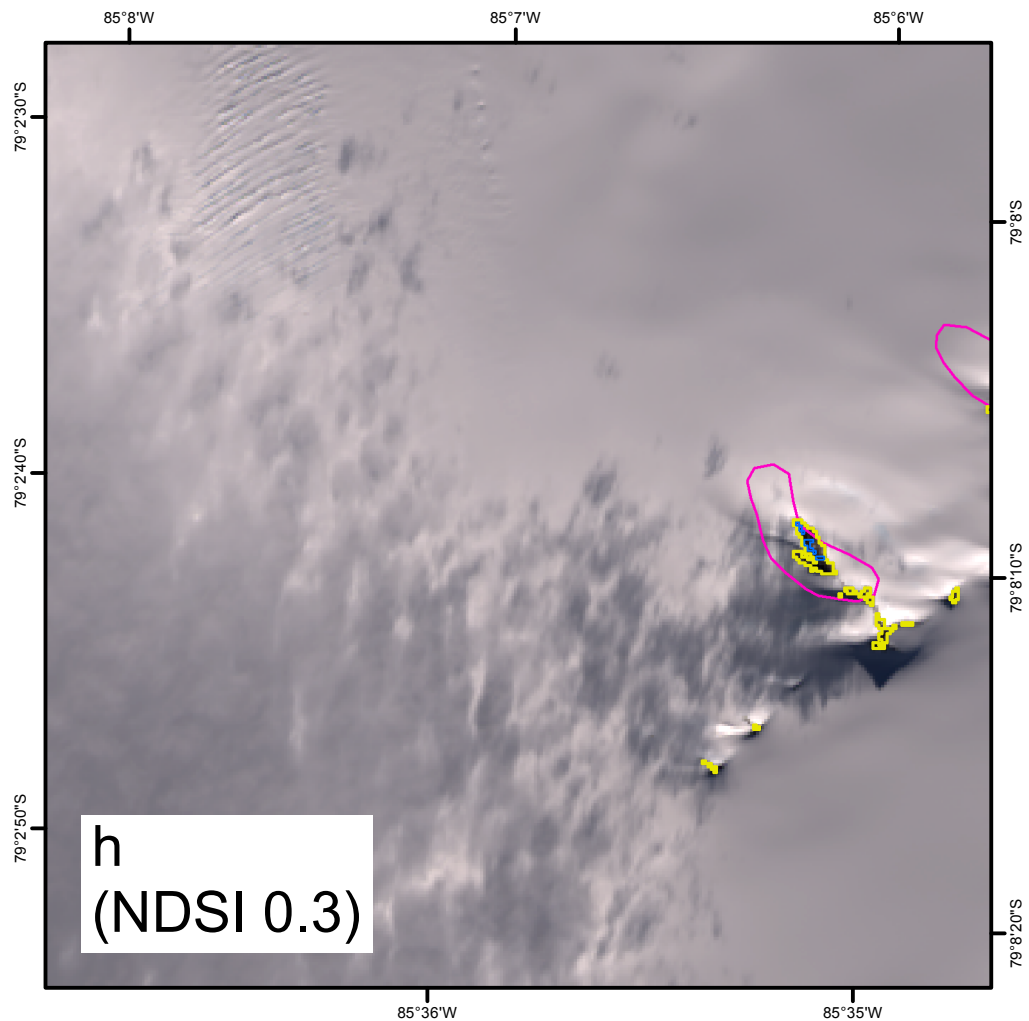

0 1 2 km

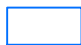

Optimum NDSI

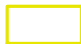

Automated Outcrop  
Identification  
(presented here)

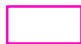

ADD Rock Outcrop



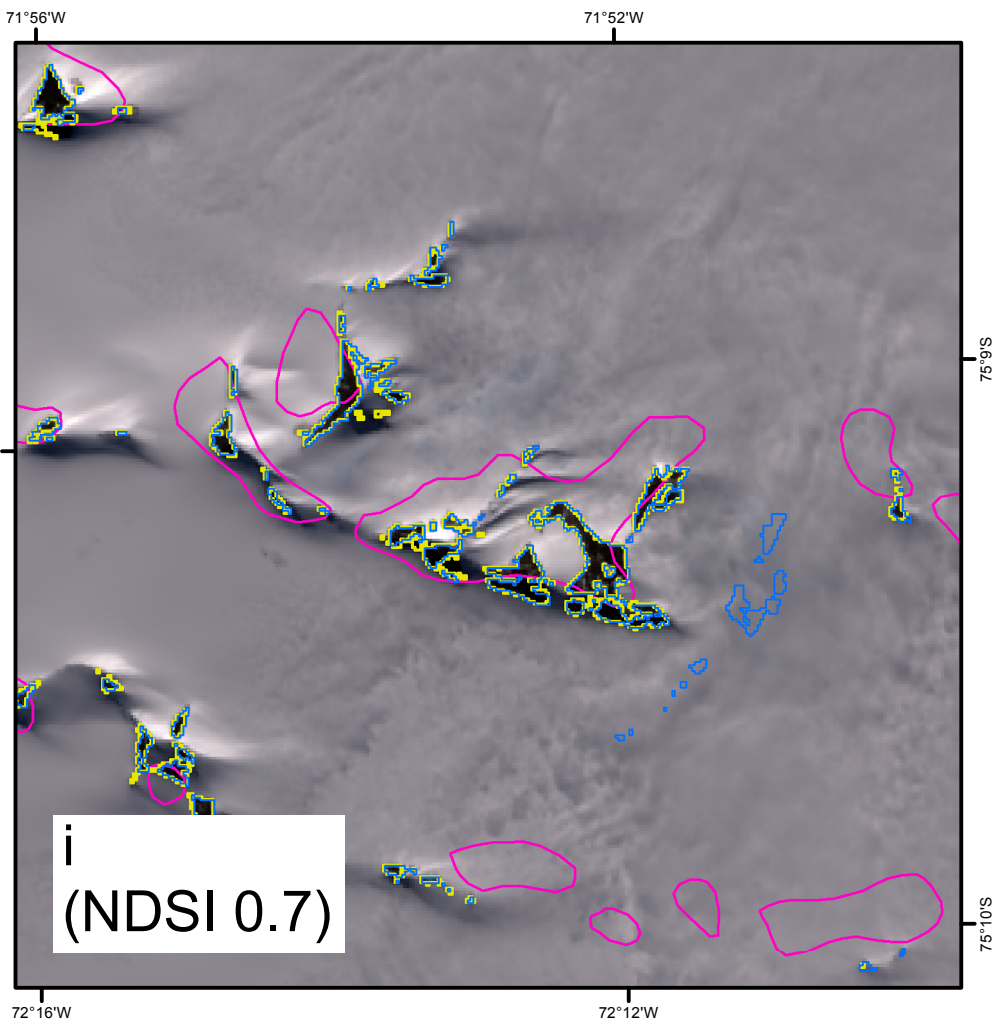

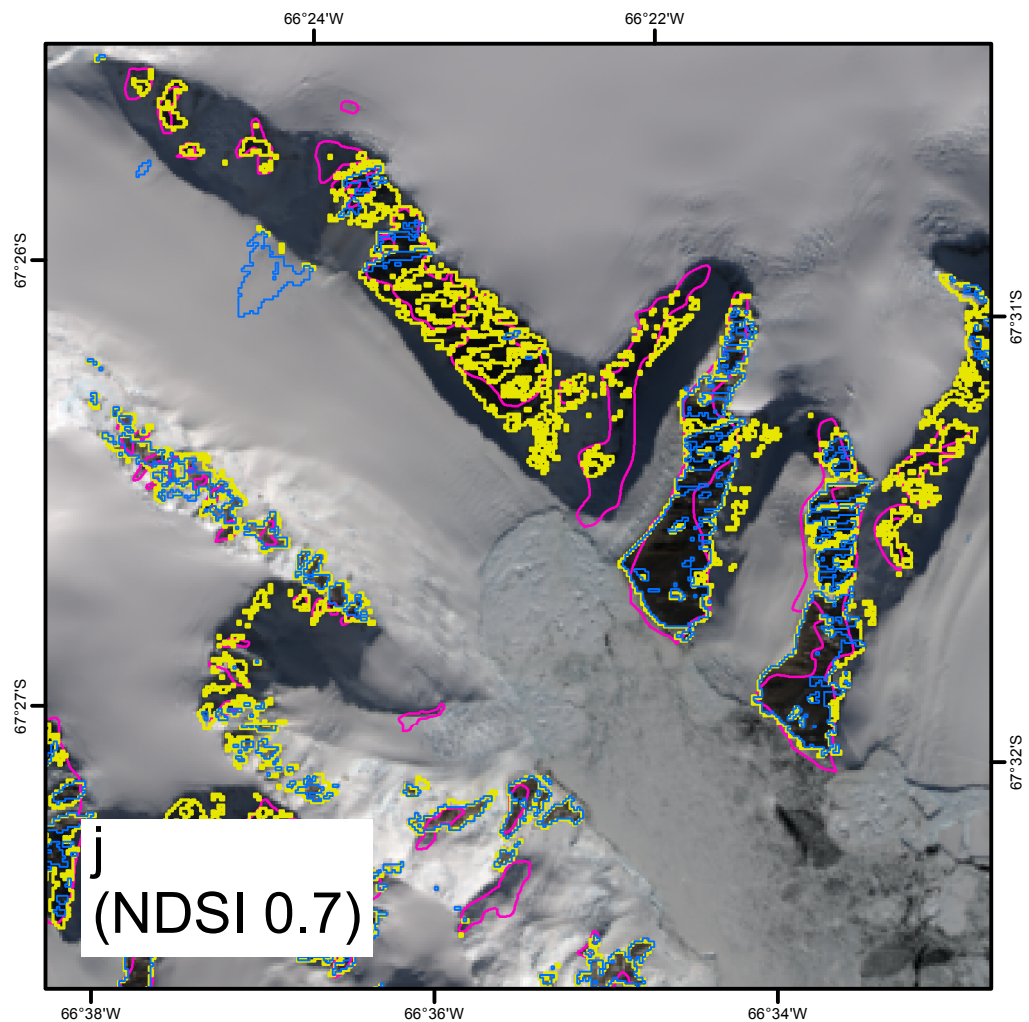

0 1 2 km

-  Optimum NDSI
-  Automated Outcrop Identification (presented here)
-  ADD Rock Outcrop
