# Supplementary material for: An automated methodology for differentiating rock from snow, clouds and seain Antarctica from Landsat 8 imagery: a new rock outcrop map and areaestimation for the entire Antarctic continent
Source: Copernicus journal article supplement (doi:10.5194/tc-10-1665-2016), 2016-08-01
Supplement: Supplementary file [file tc-10-1665-2016-supplement-title-page.pdf › tc-10-1665-2016-supplement-title-page.pdf]

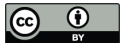

## *Supplement of*

# **An automated methodology for differentiating rock from snow, clouds and sea in Antarctica from Landsat 8 imagery: a new rock outcrop map and area estimation for the entire Antarctic continent**

**Alex Burton-Johnson et al.**

*Correspondence to:* Alex Burton-Johnson (alerto@bas.ac.uk)

- tc-10-1665-2016-supplement-title-page.pdf
- Supplementary Material
  - Fig 8 Enlarged – All QC Areas.pdf
  - Landsat Tile IDs – Differentiating snow and rock in Antarctic.pdf
  - Landsat Tile IDs – Differentiating snow and rock in Antarctic.txt
  - New rock outcrop map of Antarctica.zip

The copyright of individual parts of the supplement might differ from the CC-BY 3.0 licence.
